# Supplementary material for: Robust Prediction of Prognosis and Immunotherapy Response for Bladder Cancer through Machine Learning Algorithm
Source: MDPI journal article supplement (doi:10.3390/genes13061073), 2022-06-16
Supplement: s1 [file s1]

**Table S1.** Basic clinical characteristics of patients in this study.

|                   | TCGA (405) | E-MTAB-4321 (476) | GSE31684 (93) | IMvigor210 (348) |
|-------------------|------------|-------------------|---------------|------------------|
| <b>Age(years)</b> |            |                   |               |                  |
| ≥65               | 254(62.7%) | 309(64.9%)        | 65(69.6%)     | /                |
| < 65              | 150(37.0%) | 167(35.1%)        | 28(30.4%)     | /                |
| Unknown           | 1(0.3%)    | /                 | /             | 348(100%)        |
| <b>Sex</b>        |            |                   |               |                  |
| Male              | 299(73.8%) | 367(77.1%)        | 68(73.1%)     | 272(78.2%)       |
| Female            | 106(26.2%) | 109(22.9%)        | 25(26.9%)     | 76(21.8%)        |
| <b>Grade</b>      |            |                   |               |                  |
| High              | 382(94.3%) | 192(40.3%)        | 87(93.5%)     | /                |
| Low               | 20(4.9%)   | 277(58.2%)        | 6(6.5%)       | /                |
| Unknown           | 3(0.8%)    | /                 | /             | 348(100%)        |
| <b>Stage</b>      |            |                   |               |                  |
| I                 | 2(0.5%)    | /                 | /             | /                |
| II                | 129(31.9%) | /                 | /             | /                |
| III               | 139(34.3%) | /                 | /             | /                |
| IV                | 133(32.8%) | /                 | /             | /                |
| Unknown           | 2(0.5%)    | /                 | /             | 348(100%)        |
| <b>T stage</b>    |            |                   |               |                  |
| T1                | 4(1.0%)    | 112(23.5%)        | 15(16.1%)     | /                |
| T2                | 118(29.1%) | /                 | 17(18.3%)     | /                |
| T3                | 192(47.4%) | /                 | 42(45.2%)     | /                |
| T4                | 58(14.3%)  | /                 | 19(20.4%)     | /                |
| CIS               | /          | 3(0.6%)           | /             | /                |
| Ta                | /          | 345(72.5%)        | /             | /                |
| T2-4              | /          | 16(3.4%)          | /             | /                |
| Unknown           | 33(8.1%)   | /                 | /             | 348(100%)        |
| <b>N stage</b>    |            |                   |               |                  |
| N1                | 128(31.6%) | /                 | 28(30.1%)     | 60(17.2%)        |
| N0                | 235(58.0%) | /                 | 49(52.7%)     | 288(82.8%)       |
| Unknown           | 42(10.4%)  | /                 | 16(17.2%)     | /                |
| <b>M stage</b>    |            |                   |               |                  |
| M1                | 11(2.7%)   | /                 | 36(38.7%)     | 256(73.6%)       |
| M0                | 195(48.1%) | /                 | 57(61.3%)     | 92(26.4%)        |
| Unknown           | 199(49.1%) | /                 | /             | /                |
| <b>OS status</b>  |            |                   |               |                  |
| Dead              | 178(44.0%) | /                 | 65(69.9%)     | 232(66.7%)       |
| Living            | 227(56.0%) | /                 | 28(30.1%)     | 116(33.3%)       |
| <b>DFS status</b> |            |                   |               |                  |
| With cancer       | /          | 31(6.5%)          | /             | /                |
| Without cancer    | /          | 445(93.5%)        | /             | /                |

CIS, carcinoma in situ; OS, Overall survival; DFS, Disease-free survival.

**Table S2.** Selected features and associated weights in the prognosis model from the TCGA cohort.

| <b>Genes</b> | <b>Weights</b> |
|--------------|----------------|
| HSPA5        | 0.18745        |
| TFRC         | 0.155169       |
| SLC7A11      | 0.04036        |
| SLC1A5       | 0.038926       |
| DPP4         | 0.01807        |
| RPL8         | -0.00496       |
| LPCAT3       | -0.01444       |
| SAT1         | -0.04615       |
| GPX4         | -0.05375       |
| ACSL4        | -0.13698       |
| NFE2L2       | -0.19381       |
| FANCD2       | -0.21111       |
